# Supplementary material for: Effect of screening for type 1 diabetes on early metabolic control: the DiPiS study
Source: PubMed Central journal article supplement (PMC6290658; doi:10.1007/s00125-018-4706-z), 2018-08-14

ESM table 1. Demographics of the Follow-up and No-Follow-up groups. [6]

|                                               | Study group in DiPiS |         |       |        | <i>p</i> |
|-----------------------------------------------|----------------------|---------|-------|--------|----------|
|                                               |                      | FU      | NFU   |        |          |
| n                                             | 51                   |         | 78    |        |          |
| Age at diagnosis, mean (sd)                   | 6.78                 | (2.87)  | 6.46  | (2.62) | 0.52     |
| Girls, n (%)                                  | 28                   | (54.9)  | 38    | (48.7) | 0.61     |
| Asymptomatic at diagnosis, n (%) <sup>a</sup> | 9                    | (17.6)  | 2     | (2.6)  | 0.007    |
| DKA at diagnosis, n (%) <sup>b</sup>          | 1                    | (2.0)   | 14    | (18)   | 0.015    |
| HLA risk group, n (%) <sup>c</sup>            |                      |         |       |        | 0.016    |
| DQ 2/8                                        | 20                   | (39.2)  | 34    | (43.6) |          |
| DQ 8/8 or 8/X                                 | 23                   | (45.1)  | 18    | (23.1) |          |
| DQ 2/2 or 2/X                                 | 7                    | (13.7)  | 15    | (19.2) |          |
| DQ X/X                                        | 1                    | (2.0)   | 11    | (14.1) |          |
| First-degree relative, n (%)                  | 14                   | (28.0)  | 4     | (5.6)  | 0.001    |
| Maternal age, mean (sd)                       | 31.33                | (4.76)  | 30.27 | (4.95) | 0.23     |
| Smoked during pregnancy, n (%)                | 3                    | (6.0)   | 7     | (15.9) | 0.22     |
| Alcohol use during pregnancy, n (%)           | 9                    | (18.0)  | 7     | (15.9) | 1.0      |
| Family situation, n (%)                       |                      |         |       |        | 0.91     |
| Live with partner                             | 22                   | (44.0)  | 19    | (45.2) |          |
| Married                                       | 26                   | (52.0)  | 22    | (52.4) |          |
| Single                                        | 2                    | (4.0)   | 1     | (2.4)  |          |
| Mother born in Sweden, n (%)                  | 50                   | (100.0) | 39    | (88.6) | 0.020    |
| Father born in Sweden, n (%)                  | 45                   | (100.0) | 36    | (92.3) | 0.096    |
| CSII use at 3 months, n (%)                   | 0                    | (0.0)   | 0     | (0.0)  | 1.0      |
| CSII use at 6 months, n (%)                   | 0                    | (0.0)   | 1     | (1.4)  | 1.0      |
| CSII use at 12 months, n (%)                  | 6                    | (11.8)  | 9     | (12.0) | 1.0      |
| CSII use at 24 months, n (%)                  | 11                   | (21.6)  | 17    | (23.0) | 1.0      |
| CSII use at 36 months, n (%)                  | 17                   | (33.3)  | 25    | (33.8) | 1.0      |
| CSII use at 48 months, n (%)                  | 22                   | (44.0)  | 28    | (37.8) | 0.62     |
| CSII use at 60 months, n (%)                  | 28                   | (57.1)  | 34    | (45.9) | 0.30     |
| CSII during follow-up, n (%)                  | 30                   | (60.0)  | 37    | (49.3) | 0.32     |
| Years on CSII, mean (sd)                      | 1.65                 | (1.81)  | 1.53  | (1.89) | 0.73     |
| BMI Sd at 12 months follow-up, mean (sd)      | 0.44                 | (1.06)  | 0.38  | (1.10) | 0.75     |
| BMI Sd at 60 months follow-up, mean (sd)      | 0.80                 | (0.96)  | 0.62  | (1.01) | 0.32     |
| BMI Sd change during follow-up, mean (sd)     | 0.31                 | (0.78)  | 0.25  | (0.74) | 0.65     |
| Remission at 3 months, n (%) <sup>d</sup>     | 14                   | (29.8)  | 32    | (42.7) | 0.22     |
| Remission at 6 months, n (%)                  | 24                   | (48.0)  | 44    | (57.9) | 0.36     |
| Remission at 12 months, n (%)                 | 38                   | (76.0)  | 62    | (80.5) | 0.70     |
| Remission at 24 months, n (%)                 | 44                   | (88.0)  | 70    | (92.1) | 0.65     |
| Remission at 36 months, n (%)                 | 43                   | (100.0) | 61    | (95.3) | 0.40     |
| Remission at 48 months, n (%)                 | 40                   | (90.9)  | 66    | (98.5) | 0.16     |
| Remission at 60 months, n (%)                 | 34                   | (91.9)  | 60    | (95.2) | 0.81     |

*All percentages in columns three and five are valid percentages, ignoring subjects with missing data.*

*a: No polydipsia, polyuria, weight loss or DKA; b: pH <7.3 at diagnosis; c: X is neither 2 nor 8; d: Remission according to insulin dose adjusted HbA1c ≤ 9.0.*

ESM Table 2. HbA1c during the first five years after diabetes diagnosis, excluding participants with ketoacidosis at diagnosis

|           | Follow-up (FU) |                               |                        | No Follow-up (NFU) |                              |                        |          |
|-----------|----------------|-------------------------------|------------------------|--------------------|------------------------------|------------------------|----------|
|           | n              | IFCC Median<br>mmol/mol (IQR) | NGSP Median<br>% (IQR) | n                  | IFCC Median<br>mmol/mol(IQR) | NGSP Median<br>% (IQR) | <i>p</i> |
| Diagnosis | 51             | 76.0 (26)                     | 9.10 (2.0)             | 77                 | 83.5 (22)                    | 9.79 (2.0)             | 0.044    |
| 3 Months  | 48             | 49.0 (10)                     | 6.63 (0.9)             | 75                 | 50.0 (11)                    | 6.73 (1.0)             | 0.064    |
| 6 Months  | 51             | 51.0 (14)                     | 6.82 (1.3)             | 76                 | 54.0 (15)                    | 7.09 (1.3)             | 0.223    |
| 1 year    | 51             | 53.0 (8.0)                    | 7.00 (0.7)             | 78                 | 57.0 (14)                    | 7.37 (1.3)             | 0.003    |
| 2 years   | 51             | 53.0 (12)                     | 7.00 (1.1)             | 77                 | 59.0 (14)                    | 7.55 (1.2)             | 0.001    |
| 3 years   | 51             | 56.0 (10)                     | 7.27 (0.9)             | 73                 | 60.0 (10)                    | 7.64 (0.9)             | 0.006    |
| 4 years   | 50             | 57.0 (12)                     | 7.37 (1.1)             | 75                 | 61.0 (8.0)                   | 7.73 (0.7)             | 0.001    |
| 5 years   | 46             | 56.5 (13)                     | 7.23 (1.2)             | 74                 | 61.0 (12)                    | 7.73 (1.1)             | 0.011    |

ESM Table 3. HbA1c during the first five years after diabetes diagnosis, excluding participants with first degree relatives with insulin dependent diabetes mellitus

|           | Follow-up (FU) |                               |                        | No Follow-up (NFU) |                               |                        | <i>p</i> |
|-----------|----------------|-------------------------------|------------------------|--------------------|-------------------------------|------------------------|----------|
|           | n              | IFCC Median<br>mmol/mol (IQR) | NGSP Median<br>% (IQR) | n                  | IFCC Median<br>mmol/mol (IQR) | NGSP Median<br>% (IQR) |          |
| Diagnosis | 36             | 80.5 (25)                     | 9.52 (2.3)             | 66                 | 86.0 (23)                     | 10.02 (2.1)            | 0.020    |
| 3 Months  | 34             | 49.0 (7.8)                    | 6.63 (0.7)             | 65                 | 49.0 (12)                     | 6.63 (1.1)             | 0.533    |
| 6 Months  | 36             | 49.5 (12)                     | 6.68 (1.1)             | 65                 | 53.0 (16)                     | 7.00 (1.5)             | 0.694    |
| 1 year    | 36             | 52.0 (16)                     | 6.91 (0.6)             | 67                 | 56.0 (14)                     | 7.27 (1.2)             | 0.009    |
| 2 years   | 36             | 52.5 (14)                     | 6.95 (1.2)             | 66                 | 57.0 (8.8)                    | 7.37 (1.4)             | 0.003    |
| 3 years   | 36             | 54.5 (8.8)                    | 7.14 (0.8)             | 62                 | 59.0 (9.0)                    | 7.55 (0.8)             | 0.007    |
| 4 years   | 35             | 55.0 (11)                     | 7.18 (1.0)             | 64                 | 60.5 (12)                     | 7.69 (1.1)             | <0.001   |
| 5 years   | 32             | 55.0 (13)                     | 7.18 (1.2)             | 63                 | 60.0 (14)                     | 7.64 (1.3)             | 0.008    |

ESM Figure 1: Inclusion in the present study

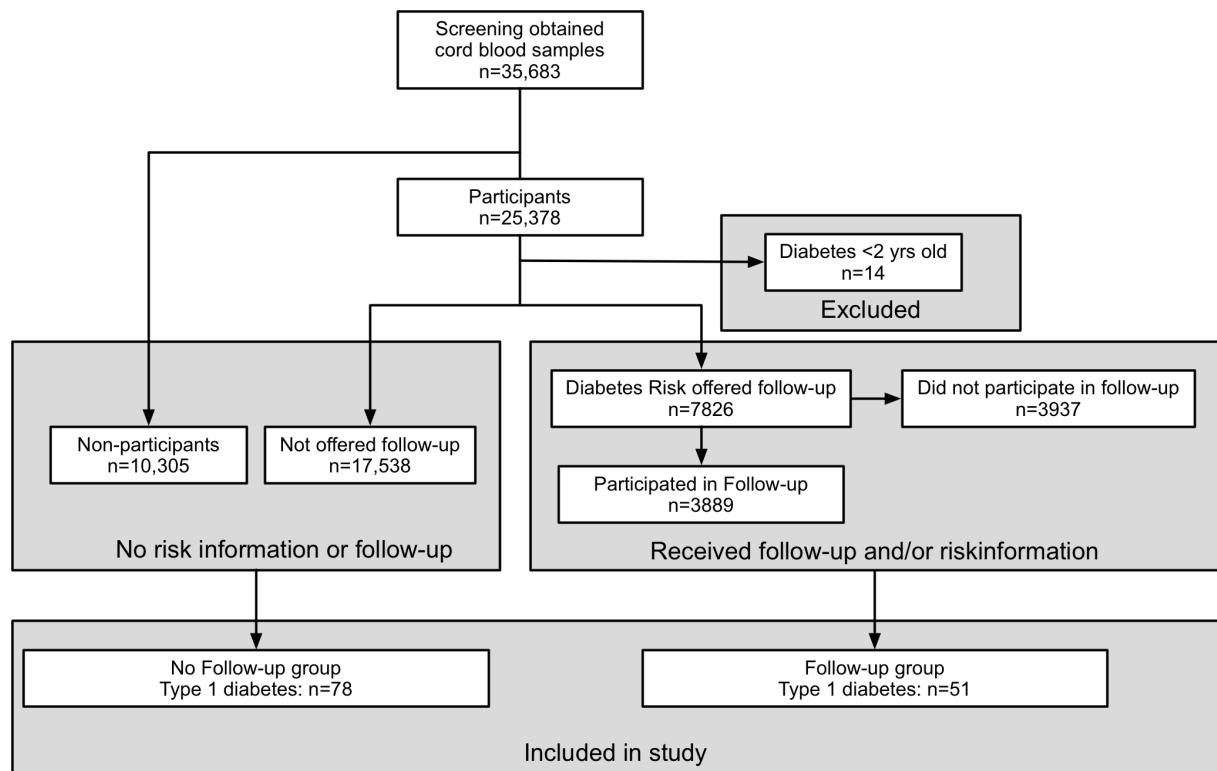

Supplement: 125_2018_4706_MOESM1_ESM.pdf [file 125_2018_4706_MOESM1_ESM.pdf]
